# Supplementary material for: Design of a Zn-MOF biosensor via a ligand “lock” for the recognition and distinction of S-containing amino acids
Source: Royal Society of Chemistry journal article supplement (doi:10.1039/c9cc01701a), 2019-01-01
Supplement: c9cc01701a1.pdf [file c9cc01701a1.pdf]

## Supplementary Information

# Design of Zn-MOF the Biosensor via a Ligand “Lock” for the Recognition and Distinction of S-containing Amino Acids

Xiao-Qin Wu,<sup>a,b</sup> Yan Liu,<sup>b</sup> Pei-Qi Feng,<sup>a</sup> Xue-Hong Wei,<sup>a</sup> Xiao-Hang Qiu<sup>b\*</sup> and Jian-Gong Ma,<sup>b\*</sup>

### Experimental Part

#### 1.1 Chemicals and Instrumentation

Zinc(II) nitrate ( $\text{Zn}(\text{NO}_3)_2 \cdot 6\text{H}_2\text{O}$ , 99%), 2,5-thiophenedicarboxylic acid ( $\text{H}_2\text{L}$ , >95%), 2,2'-dipyridyl (bipy, >99%) N,N-dimethylacetamide (DMA, >99%), L-cysteine (L-Cys, >99%), L-methionine (L-Met, >99%) and L-cystine (L-Cys-Cys, >99%) were purchased from commercial suppliers (Aladdin-reagent and J&K-reagent) and were used as received without further purification. All solutions were prepared with ultrapure water.

The phases were analyzed by X-ray powder diffraction (XRD) using a D/Max-2500 X-ray diffractometer with Cu  $K\alpha$  radiation. The FT-IR spectra were measured with a Bruker Tensor 27 spectrophotometer on KBr disks. TGA experiments were performed on a NETZSCH TG 209 instrument with a heating rate of  $10\text{ }^\circ\text{C min}^{-1}$ .

The crystal data were collected by an Agilent Technologies SuperNova Single Crystal Diffractometer. The phases were analyzed by X-ray powder diffraction (XRD) using a D/Max-2500 X-ray diffractometer with Cu  $K\alpha$  radiation. The FT-IR spectra were measured with a Bruker Tensor 27 spectrophotometer on KBr disks. TGA experiments were performed on a NETZSCH TG 209 instrument with a heating rate of  $10\text{ }^\circ\text{C min}^{-1}$ .

#### 1.2 Synthesis of $\{[\text{Zn}_2(\text{L})_2(\mu_2\text{-O})(\text{H}_2\text{O})_3] \cdot 2\text{DMA}\}_n$ (Zn-1)

A mixture of 59.50 mg (0.2 mmol)  $\text{Zn}(\text{NO}_3)_2 \cdot 6\text{H}_2\text{O}$  and 46.04 mg (0.2 mmol)  $\text{H}_2\text{L}$  was dissolved in a mixture of 5 mL DMF and 5 mL  $\text{H}_2\text{O}$ , and then heated for 2 days at  $90\text{ }^\circ\text{C}$  in a Parr Teflon-lined stainless steel vessel (23 mL), then cooled to room temperature slowly in 2 days. Colorless sheet crystals of **Zn-1** were collected at the bottom of the glass vessel. Yield: 44.2 mg (81.7 %). Anal. Calc for  $\text{C}_{12}\text{H}_{10}\text{O}_{12}\text{S}_2\text{Zn}_2$ : C, 26.2; H, 1.8; Found: C, 25.8; H, 2.0; IR: 3078.49 w, 1589.16 m, 1557.10 s, 1529.78 s, 1516.84 m, 1493.22 w, 1465.58 w, 1429.83 m, 1361.03 s, 1337.20 s, 1316.06 m, 1220.59 w, 1140.48 m, 1103.23 m, 1049.37 w, 1023.70 w, 867.15 s, 845.51 s, 809.90 s, 784.79 m, 770.77 s, 723.13 s, 684.60 w.

#### 1.3 Synthesis of $\{[\text{Zn}_2(\text{L})_2(2,2'\text{-bipy})(\mu_2\text{-O})(\text{H}_2\text{O})_2]_n\}$ (Zn-2) from Zn-1

We chose several single crystals of **Zn-1** which was synthesized followed by the steps based on the above description of **1.2**, and then these **Zn-1** single crystals were put in a glass bottle with 0.03 mM auxiliary ligand 2,2'-dipyridyl (solvent: mixture of DMF and H<sub>2</sub>O 2:1,v/v). It heated for 2 days at 90 °C, then cooled to room temperature slowly in 2 days. Colorless diamond-like crystals of **Zn-2** were converted from **Zn-1** can be collected at the bottom of glass bottle. The phase purity of **Zn-1** and **Zn-2** were confirmed by the PXRD methods (See Fig. S3 and S4).

#### 1.4 Synthesis of $\{[Zn_2(L)_2(2,2'\text{-bipy})(\mu_2\text{-O})(H_2O)_2]_n\}$ (**Zn-2**) directly

A mixture of 59.50 mg (0.2 mmol) Zn(NO<sub>3</sub>)<sub>2</sub>·6H<sub>2</sub>O, 31.24 mg (0.2 mmol) 2,2'-dipyridyl and 46.04 mg (0.2 mmol) H<sub>2</sub>L was dissolved in a mixture of 5 mL DMF and 5 mL H<sub>2</sub>O, and then heated for 2 days at 90 °C in a Parr Teflon-lined stainless steel vessel (23 mL), then cooled to room temperature slowly in 2 days. Colorless diamond-like crystals of **Zn-2** were collected at the bottom of the vessel. Yield: 45.4 mg (86.9 %). Anal. Calc for C<sub>22</sub>H<sub>15</sub>N<sub>2</sub>O<sub>11</sub>S<sub>2</sub>Zn<sub>2</sub>: C, 38.96; H, 2.23, N, 4.12; Found: C, 38.92; H, 2.30, N, 4.10 (%); IR: 3201.41 w, 1606.01 s, 1586.54 s, 1572.69 m, 1528.66 w, 1472.53 s, 1489.04 w, 1439.22 s, 1351.31 s, 1311.23 s, 1248.74 m, 1211.33 m, 1169.12 w, 1152.21 m, 1108.20 w, 1055.50 w, 1040.77 m, 1023.93 m, 823.41 m, 795.16 s, 771.75 s, 760.80 s, 736.93 s, 684.16 m, 651.29 m.

## 2. Characterization

### 2.1 X-ray crystallography

Diffraction intensity data for single crystals of **Zn-1** and **Zn-2** were collected on a Agilent Technologies SuperNova Single Crystal Diffractometer at 293 (2) K equipped with graphite-monochromatic Mo K $\alpha$  radiation ( $\lambda = 0.71073$  Å). The structures were solved by SHELXS (direct methods) and refined by SHELXL (full matrix least-squares techniques)<sup>1</sup> in the Olex2 package.<sup>2</sup>

**Table 1.** Crystal data and structure refinements for **Zn-1** and **Zn-2**

|                                                  | <b>Zn-1</b>                                                                    | <b>Zn-2</b>                                                                                   |
|--------------------------------------------------|--------------------------------------------------------------------------------|-----------------------------------------------------------------------------------------------|
| formula                                          | C <sub>12</sub> H <sub>10</sub> O <sub>12</sub> S <sub>2</sub> Zn <sub>2</sub> | C <sub>22</sub> H <sub>15</sub> N <sub>2</sub> O <sub>11</sub> S <sub>2</sub> Zn <sub>2</sub> |
| M, g mol <sup>-1</sup>                           | 522.35                                                                         | 678.22                                                                                        |
| crystalsyst                                      | Monoclinic system                                                              | Triclinic system                                                                              |
| space group                                      | <i>P</i> 2/m                                                                   | <i>P</i> -1                                                                                   |
| <i>a</i> / Å                                     | 14.4432(3)                                                                     | 11.1191(10)                                                                                   |
| <i>b</i> / Å                                     | 15.7741(3)                                                                     | 11.1367(10)                                                                                   |
| <i>c</i> / Å                                     | 15.7204(4)                                                                     | 15.4541(14)                                                                                   |
| $\alpha$ / deg                                   | 90.00                                                                          | 87.029(3)                                                                                     |
| $\beta$ / deg                                    | 104.090(3)                                                                     | 86.265(3)                                                                                     |
| $\gamma$ / deg                                   | 90.00                                                                          | 84.741(3)                                                                                     |
| <i>V</i> / Å <sup>3</sup>                        | 3448.6(7)                                                                      | 1899.6(3)                                                                                     |
| <i>Z</i>                                         | 2                                                                              | 2                                                                                             |
| reflns collected                                 | 6308                                                                           | 6624                                                                                          |
| unique reflns                                    | 4839                                                                           | 6200                                                                                          |
| <i>R</i> 1 [ <i>I</i> > 2 $\sigma$ ( <i>I</i> )] | 0.1236                                                                         | 0.0874                                                                                        |
| <i>wR</i> 2(all data)                            | 0.3601                                                                         | 0.2310                                                                                        |

1. G. M. Sheldrick, *Acta Cryst.*, 2008, **A64**, 112-122

2. O. V. Dolomanov, L. J. Bourhis, R. J. Gildea, J. A. K. Howard and H. Puschmann, *J. Appl. Cryst.*, 2009, **42**, 339-341.

#### 1.4 Thermal Gravimetric Analyses.

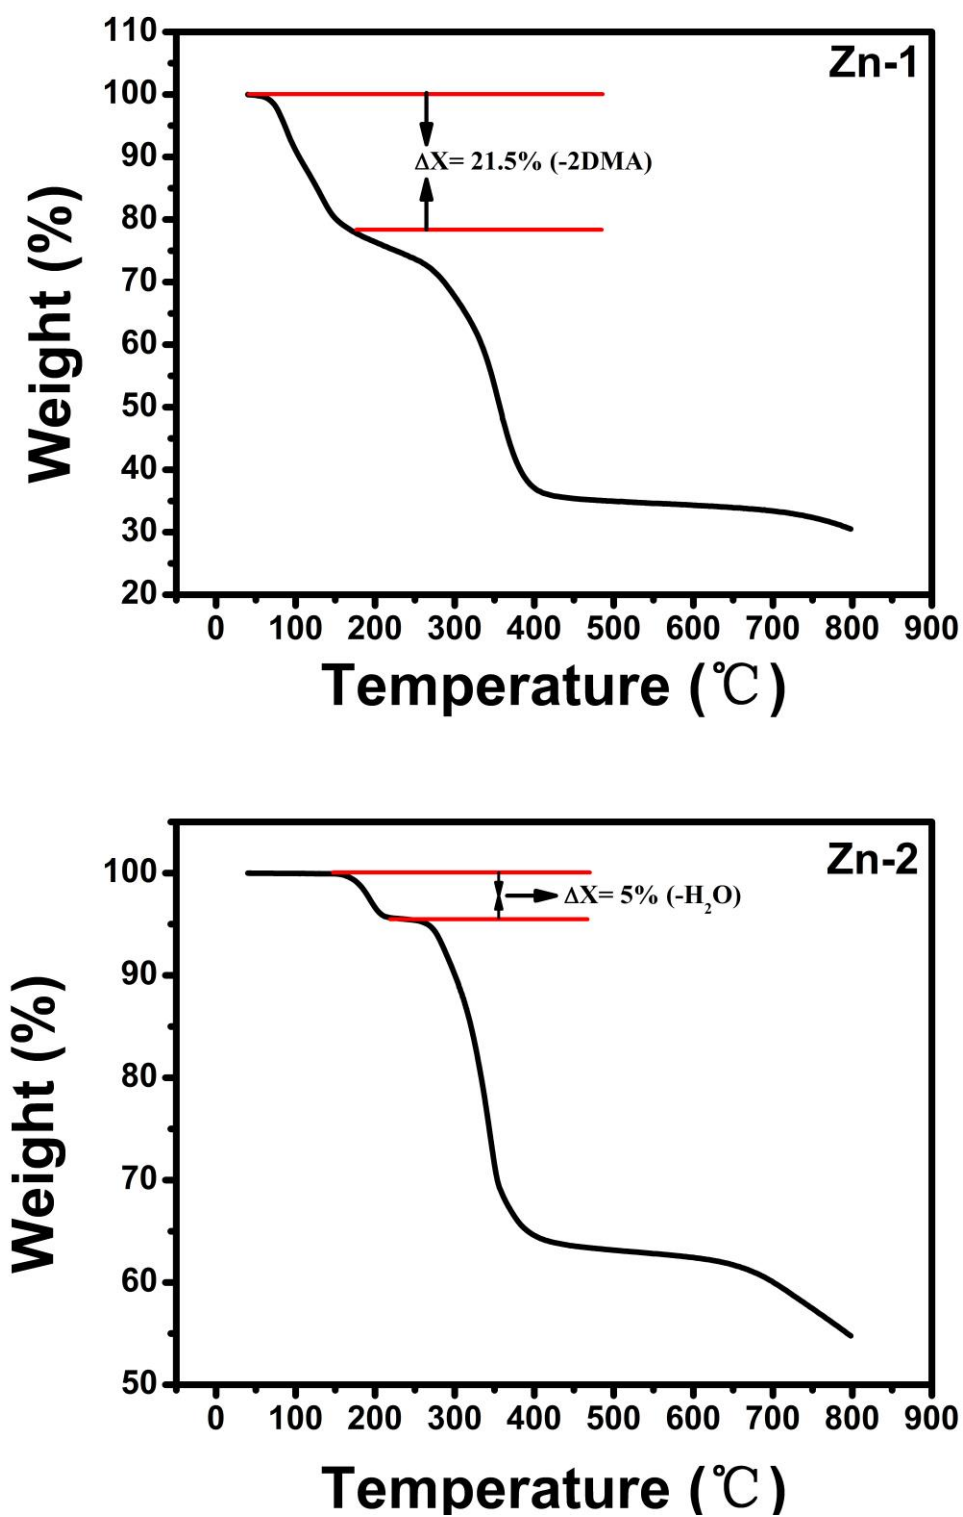

Fig. S1. Thermal gravimetric analyses (TGA) of Zn-1 and Zn-2

## 1.5 Powder X-ray Diffraction patterns

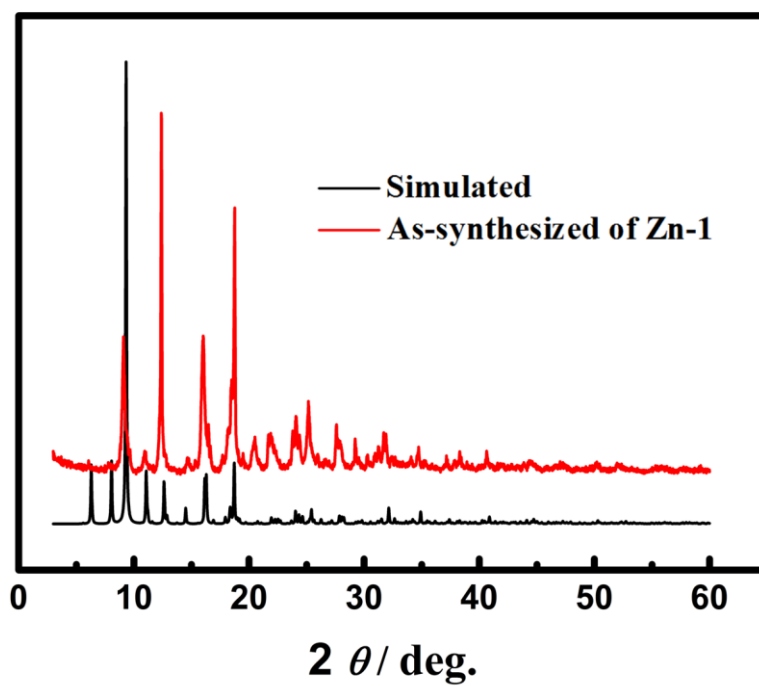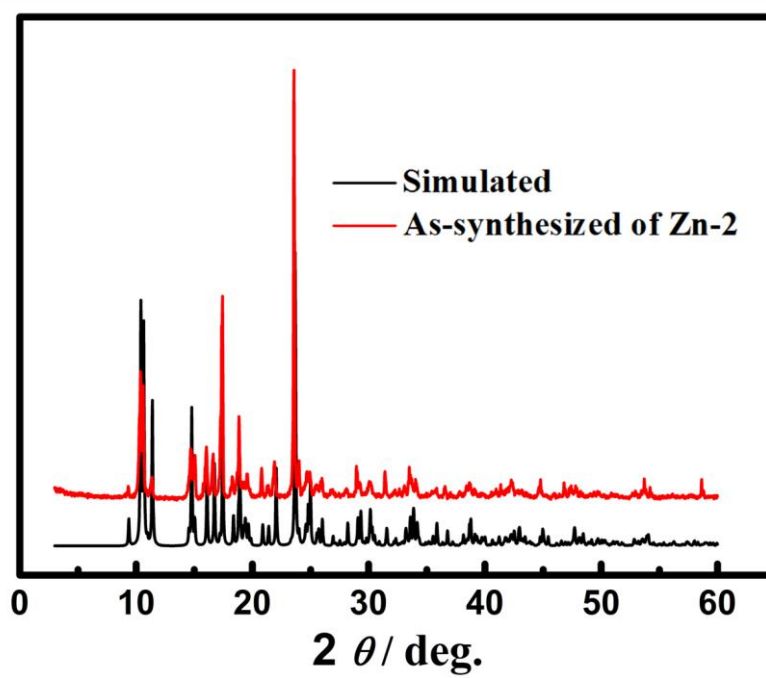

**Fig. S2.** PXRD patterns of the simulated one from single-crystal date of **Zn-1** and **Zn-2**, compare with the samples **Zn-1** and **Zn-2** as synthesized, respectively.

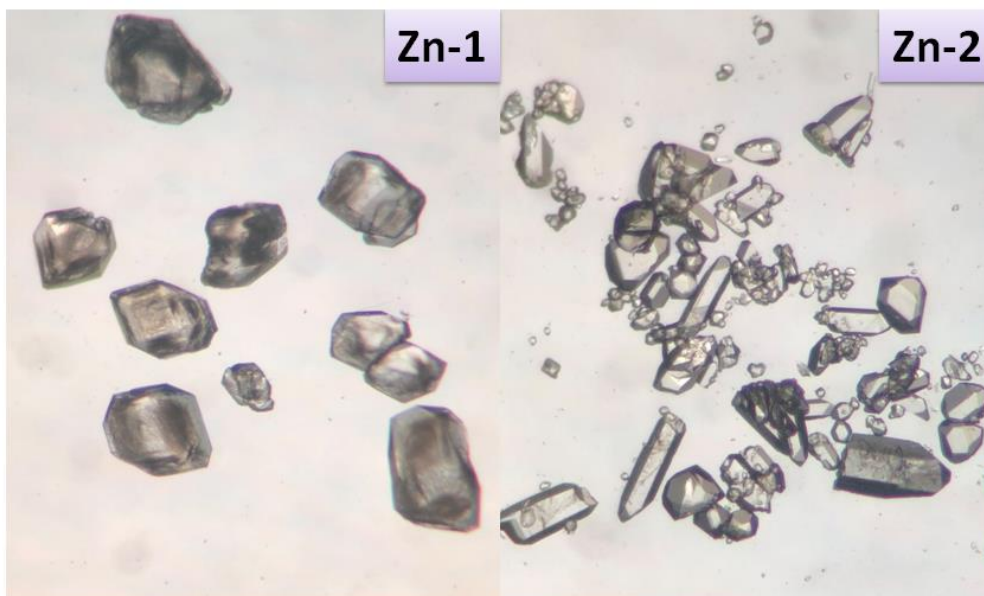

Fig. S3. Single crystal conversion of Zn-1 to Zn-2

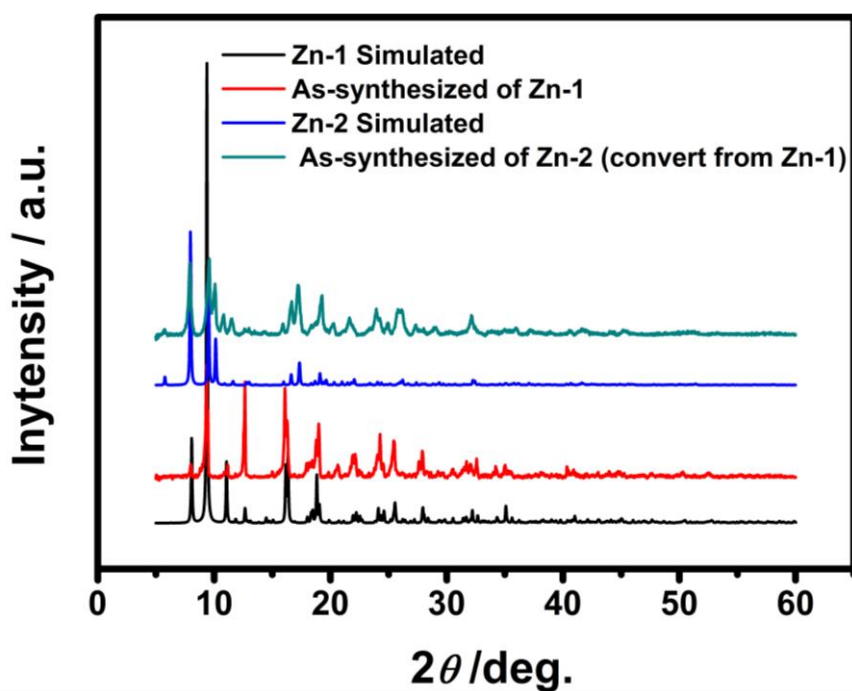

Fig. S4. PXRD patterns of the simulated one from single-crystal data of Zn-1 and Zn-2, compare with the samples Zn-1 as synthesized and Zn-2 convert from Zn-1, respectively.

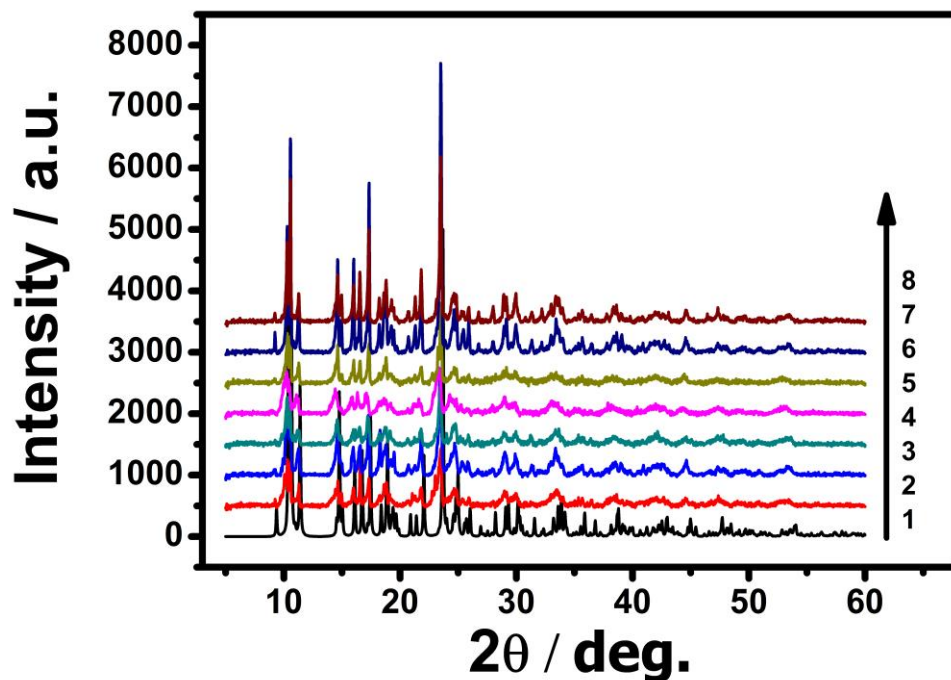

Fig. S5. PXRD patterns of the simulated one from single-crystal date of **Zn-2** (1) compare with PXRD the patterns for **Zn-2** after immerse in ethanol (2), DMF (3), DMA (4), acetonitrile (5), Methanol (6), tetrahydrofuran (7), dichloromethane (8) for two weeks, respectively.

### 3. Electrochemical Section

Cyclic Voltammetry (CV) Analysis: A Chi660e electrochemical workstation (China) was used for CV studies.

Three-electrode system was used as follow:

Working electrode (WE): **Zn-2** coated on an Au electrode (**AuE**), named **Zn-2/AuE**, was used as working electrodes.

Reference electrode (RE): 0.1M AgNO<sub>3</sub>-acetonitrile solution as electrode solution was filled into a silver ion electrode (SIE).

Auxiliary electrode (AE): a platinum wire electrode was used as the auxiliary electrode in the whole work.

Electrolyte: 0.5 mol/L [Bmim]BF<sub>4</sub> in DMF solution (DMF-BMIMBF<sub>4</sub>).

All studies were carried out at room temperature and under nitrogen surroundings.

Prior to be used, the bare AuE was carefully polished with an alumina slurry (0.5 μm particle size) until a mirror-like surface was obtained, then rinsed ultrasonically with ultrapure water, nitric acid (1:1, v/v), sodium hydroxide (0.1 mol·cm<sup>-3</sup>) and ethanol, respectively, to remove any alumina residue from the electrode surface. The ultrasonic process was handled with an ultrasonic cleaning machine (Elma, S100H).

Electrode modification was performed as follow: depositing 0.025g **Zn-2** dissolved in the nafion solution and 10 μL of this solution were putting on the AuE surface. Then a clean beaker was coated

on the modified electrode, which dried in the air for 12 h.

Impedance Analysis: Electrochemical Impedance Spectroscopy (EIS) was performed using a Chi660E electrochemical workstation (China). All samples were collected using the above three-electrode system in 10 mL DMF-BMIMBF<sub>4</sub> solution, which act as an electrolyte, EIS frequency was cycled between 0.1 Hz –100 kHz.



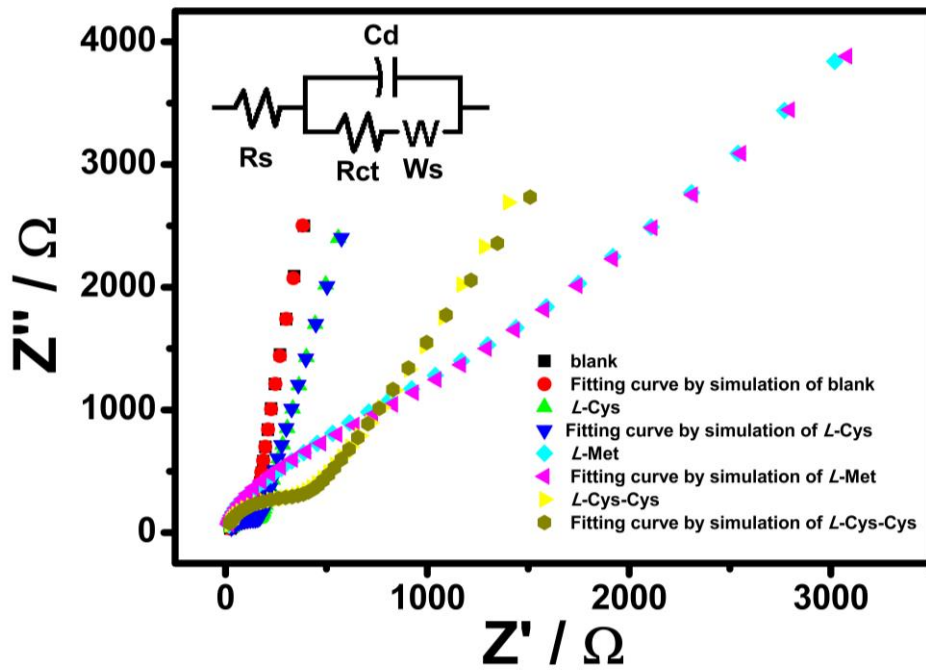

Fig. S6. Nyquist plots and fitting curves of Zn-2/AuE in DMF-BMIMBF4 solution or containing 0.5 mM L-Cys, L-Met and L-Cys-Cys, respectively

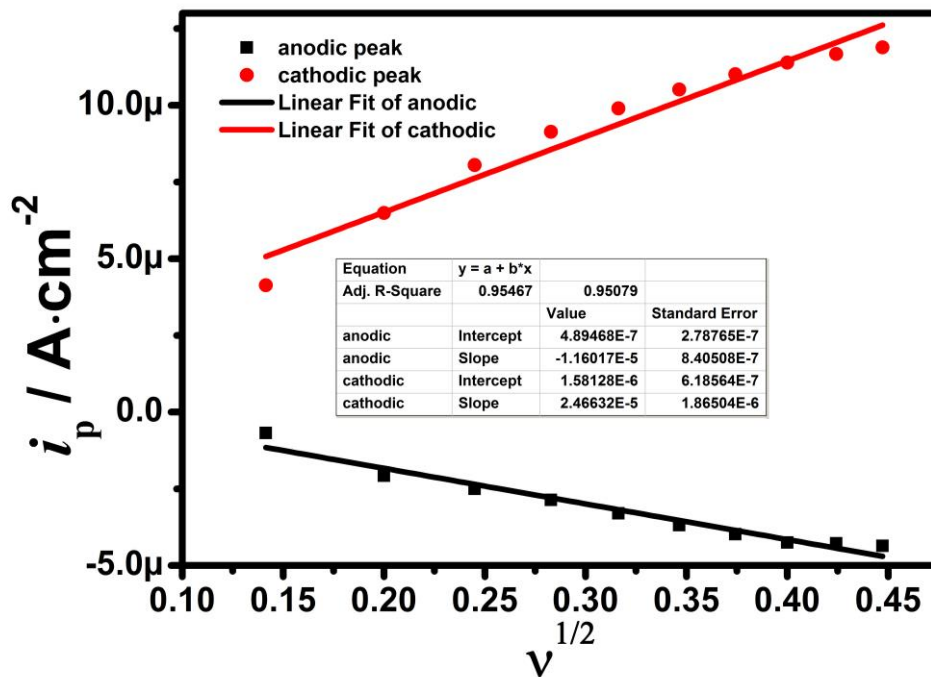

Fig. S7. Plots and parameters of  $i_{pa}$  and  $i_{pc}$  vs square root of scan rate  $v^{1/2}$  for Fig. 2 (b).

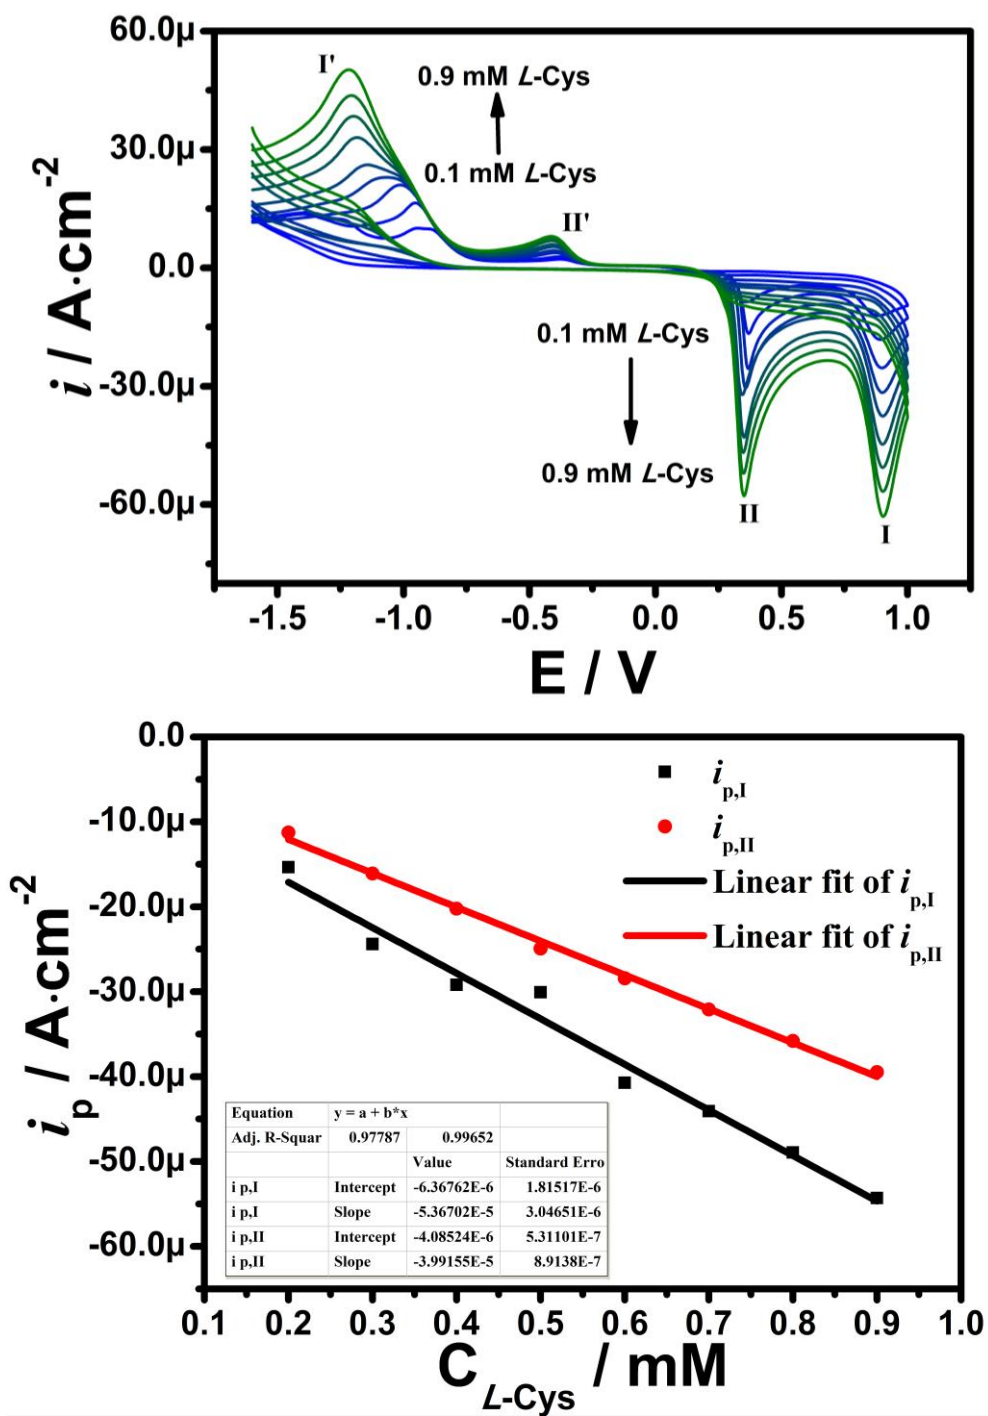

Fig. S8. Top: CVs of Zn-2/AuE in DMF-BMIMBF<sub>4</sub> solution with L-Cys concentrations of 0.1, 0.2, 0.2, 0.4, 0.5, 0.6, 0.7, 0.8, 0.9 mM. Below: Plots of  $i_{p,I}$  and  $i_{p,II}$  vs L-Cys concentration.

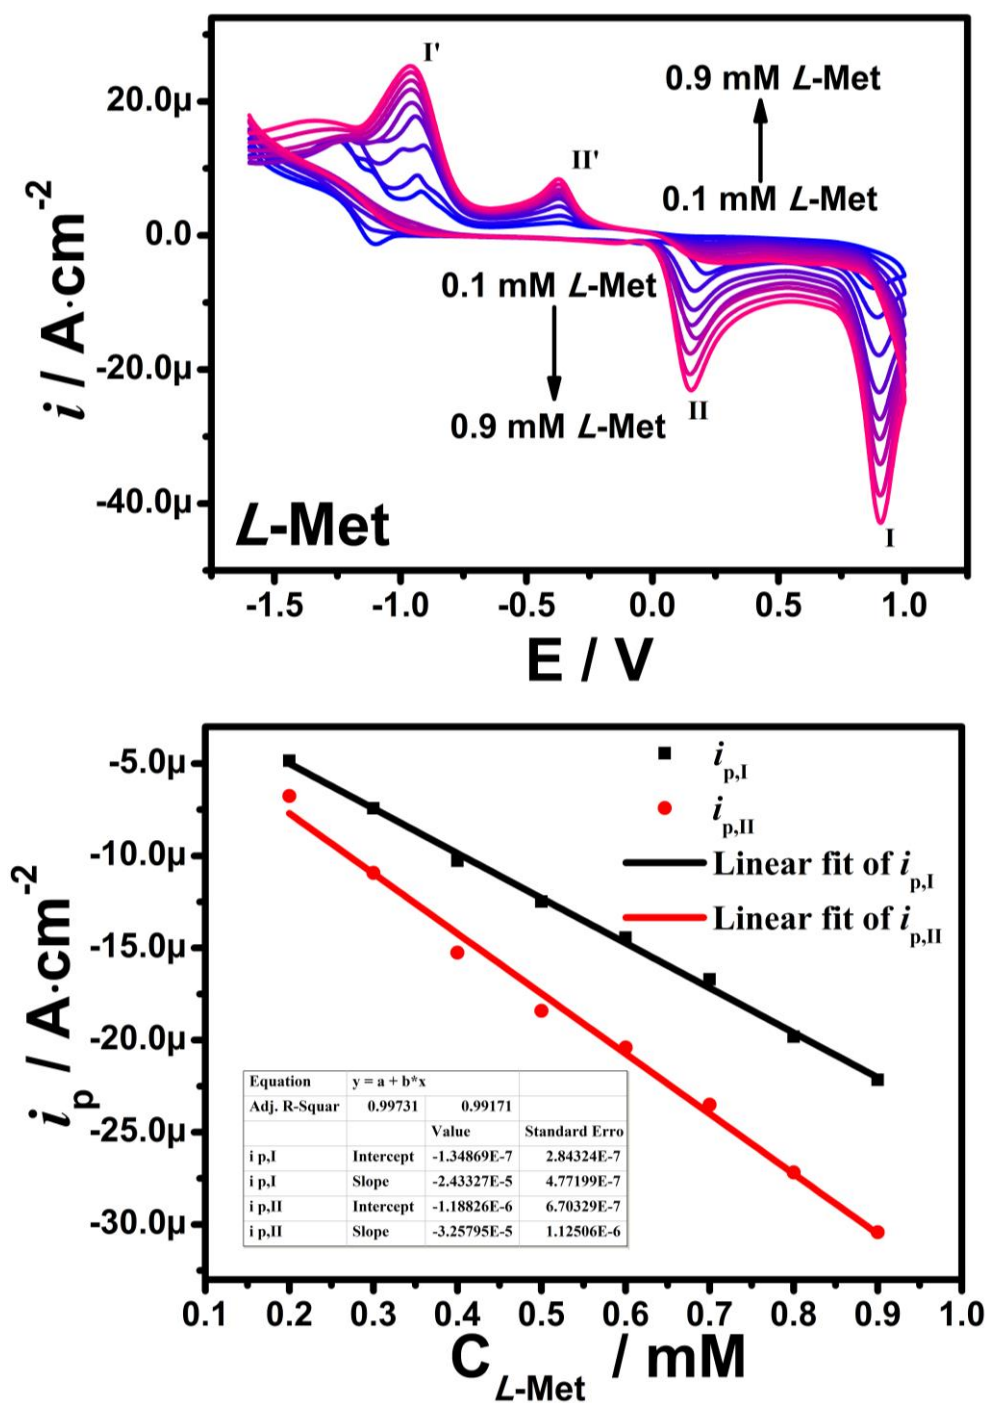

Fig. S9. Top: CVs of  $\text{Zn-2}/\text{AuE}$  in  $\text{DMF-BMIMBF}_4$  solution with  $L\text{-Met}$  concentrations of 0.1, 0.2, 0.2, 0.4, 0.5, 0.6, 0.7, 0.8, 0.9 mM. Below: Plots of  $i_{p,I}$  and  $i_{p,II}$  vs  $L\text{-Met}$  concentration.

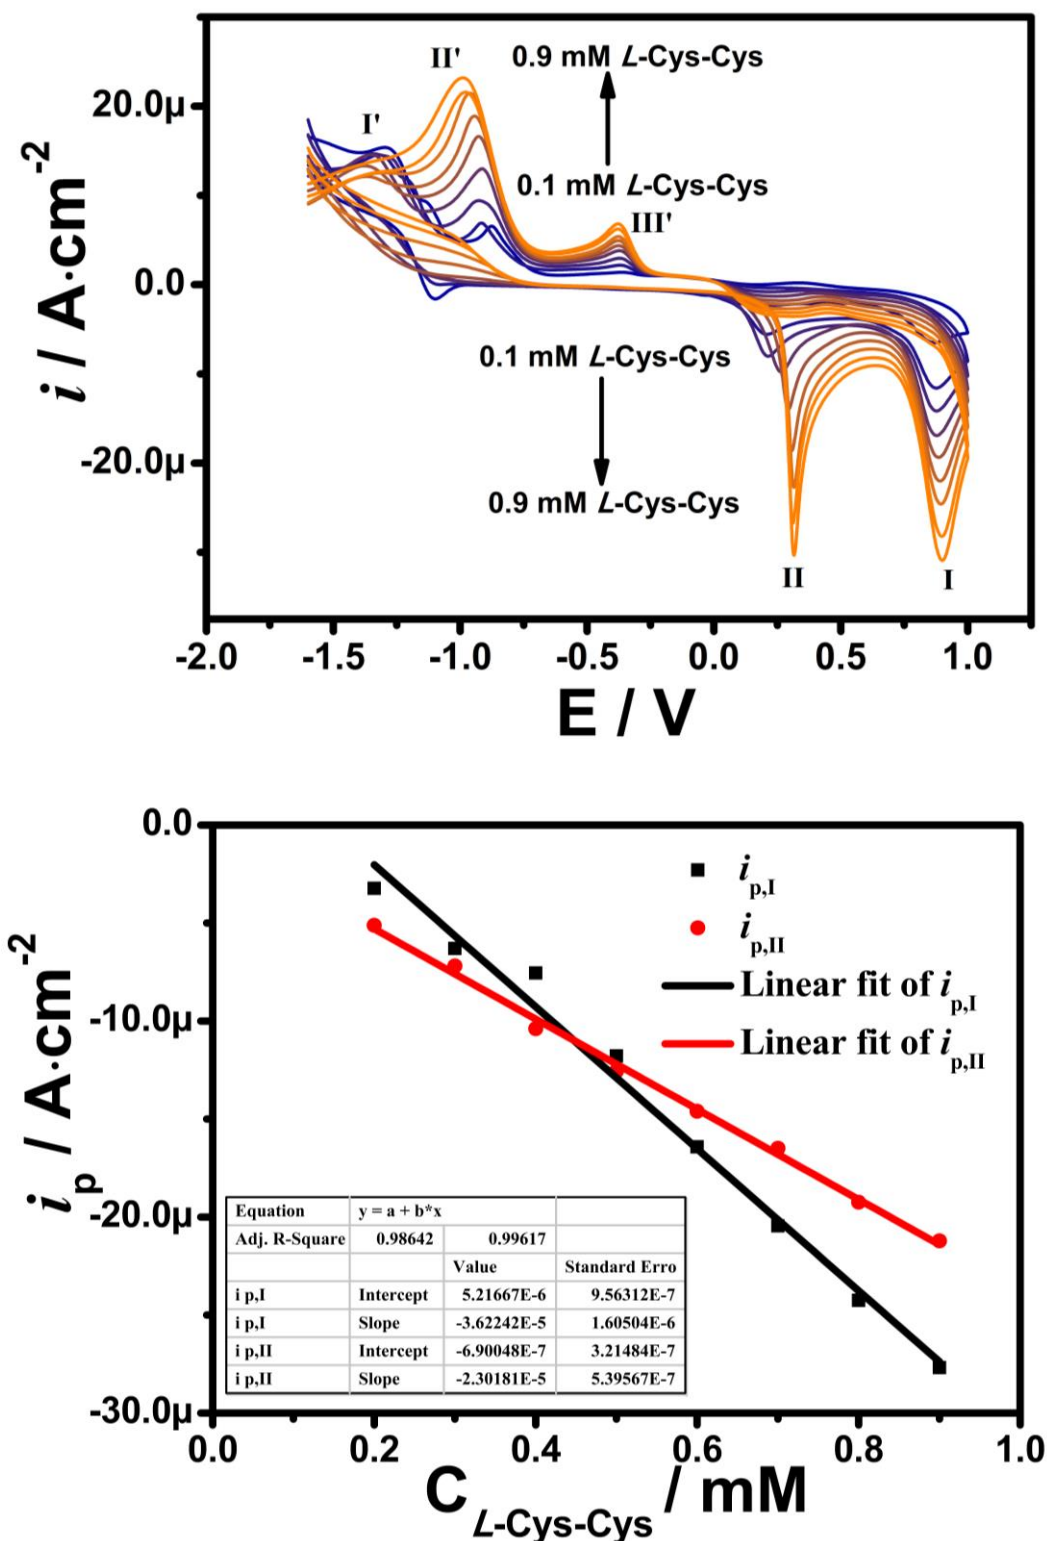

**Fig. S10.** Top: CVs of Zn-2/AuE in DMF-BMIMBF<sub>4</sub> solution with L-Cys-Cys concentrations of 0.1, 0.2, 0.2, 0.4, 0.5, 0.6, 0.7, 0.8, 0.9 mM. Below: Plots of  $i_{p,I}$  and  $i_{p,II}$  vs L-Cys-Cys concentration. In the process of experiment, we added every 10  $\mu\text{l}$  in electrolytic cell, with the increase of concentration, there will be a part of the L-Cys-Cys is decomposed into L-Cys due to the electrochemical redox effect. It lead to the peak II potential gradually changed from 0.29 V to 0.35 V (L-Cys one, Fig. S8(top))

The following points can be seen from the above pictures(Fig. S8and Fig. S10):

(1) For Fig. S10(top): in the process of experiment, we added every 10 ul in electrolytic cell, with the increase of concentration, there will be a part of the *L*-Cys-Cys is decomposed into *L*-Cys due to the electrochemical redox effect. It lead to the peak II potential gradually changed from 0.29 V to 0.35 V (*L*-Cys one, Fig. S8(top)).

(2) what is the cause of *L*-Cys-Cys partial decomposition? First of all, contrasting concentration linear fitting graph of Fig. S10(below) and Fig. S8(below), we can seen that the same concentration of two kinds of different amino acids *L*-Cys-Cys and *L*-Cys, the peak II current density value ( $i_{p,II}$ )of the gap is very big, for example, 0.5 mM of *L*-Cys  $i_{p,II}$  was  $3.008 \times 10^{-5}$  A, and the same concentration of *L*-Cys-Cys  $i_{p,II}$  is only  $1.178 \times 10^{-5}$  A. Thus, It comfirmed that the *L*-Cys-Cys part decomposition. Secondly, comparing the concentration-peak current density curve ( $c-i_{p,II}$ ) of Fig. S10 (below) and Fig. S8(below), it is obvious that  $i_{p,II}$  of *L*-Cys-Cys varies greatly as the increasing of the concentration (the slope value of red line (Fig. S10(below))  $-2.30181 \times 10^{-5} \text{ A} \cdot \text{cm}^{-2}$ > the slope value of red line (Fig. S8(below))  $-3.99155 \times 10^{-5} \text{ A} \cdot \text{cm}^{-2}$ ). As the concentration of *L*-Cys-Cys increases, the amount of decomposed *L*-Cys also increases, which increases the change rate of  $i_{p,II}$ .

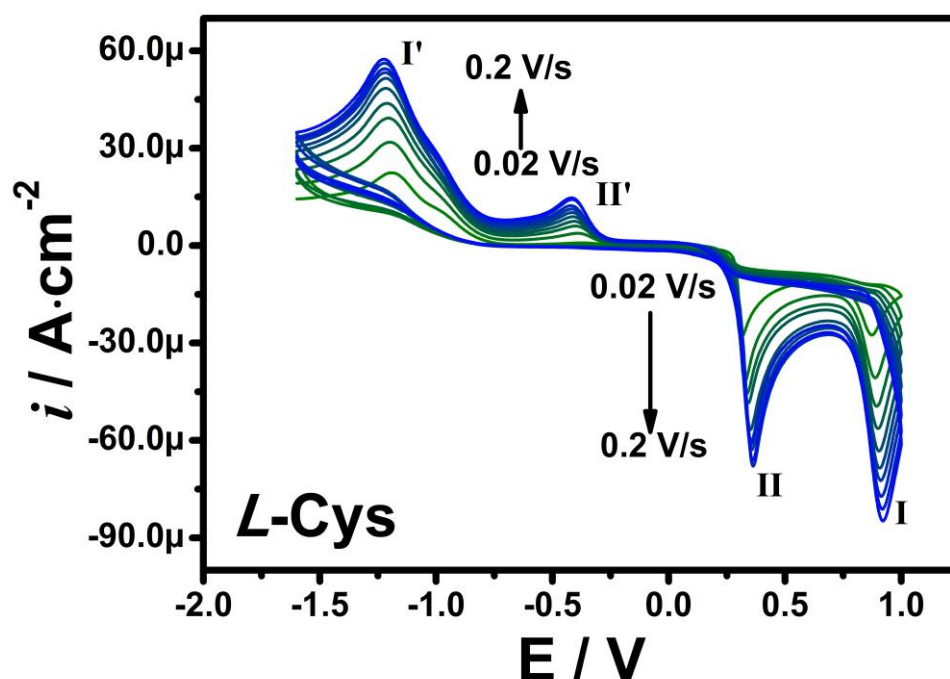

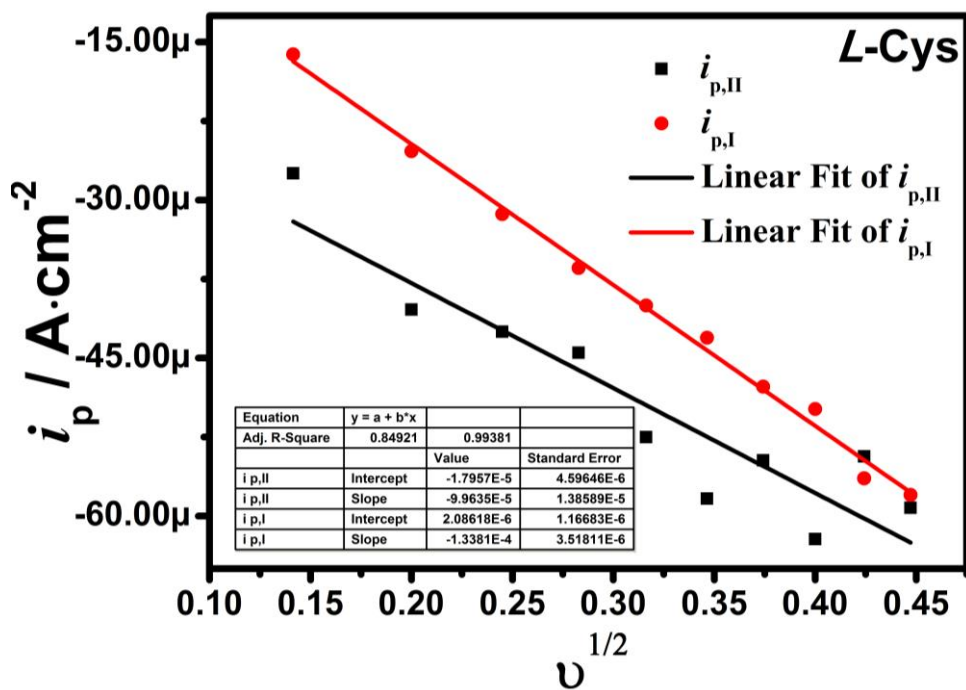

**Fig. S11.** Top: CVs of Zn-2/AuE in DMF-BMIMBF<sub>4</sub> solution with 0.9 mM L-Cys at different scan rates from 0.02 V·s<sup>-1</sup> to 0.2 V·s<sup>-1</sup>. Below: Plots of  $i_{p,I}$  and  $i_{p,II}$  vs square root of scan rates ( $v^{1/2}$ ), respectively.

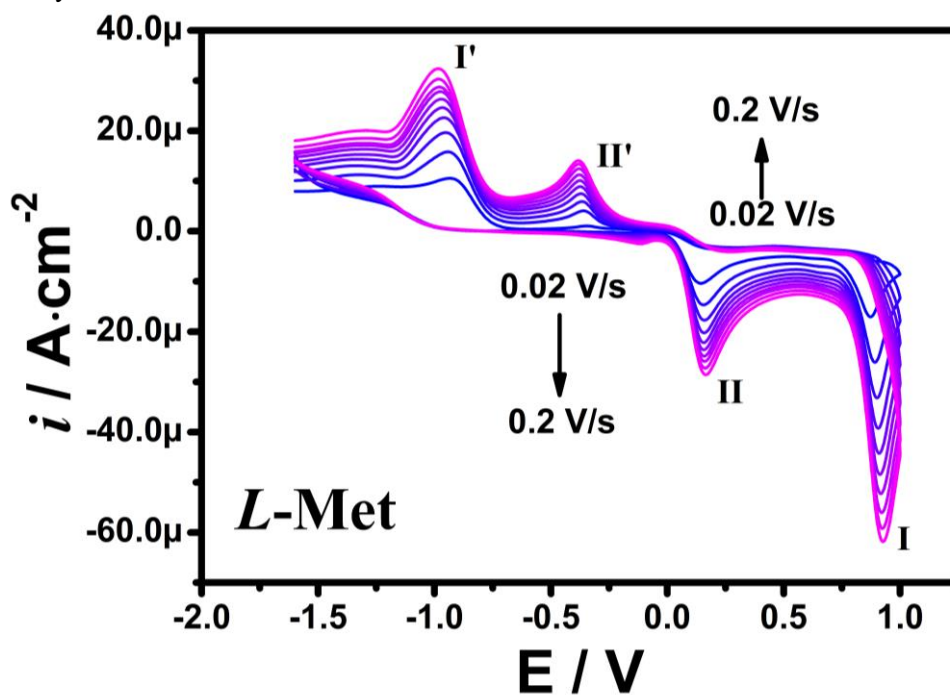

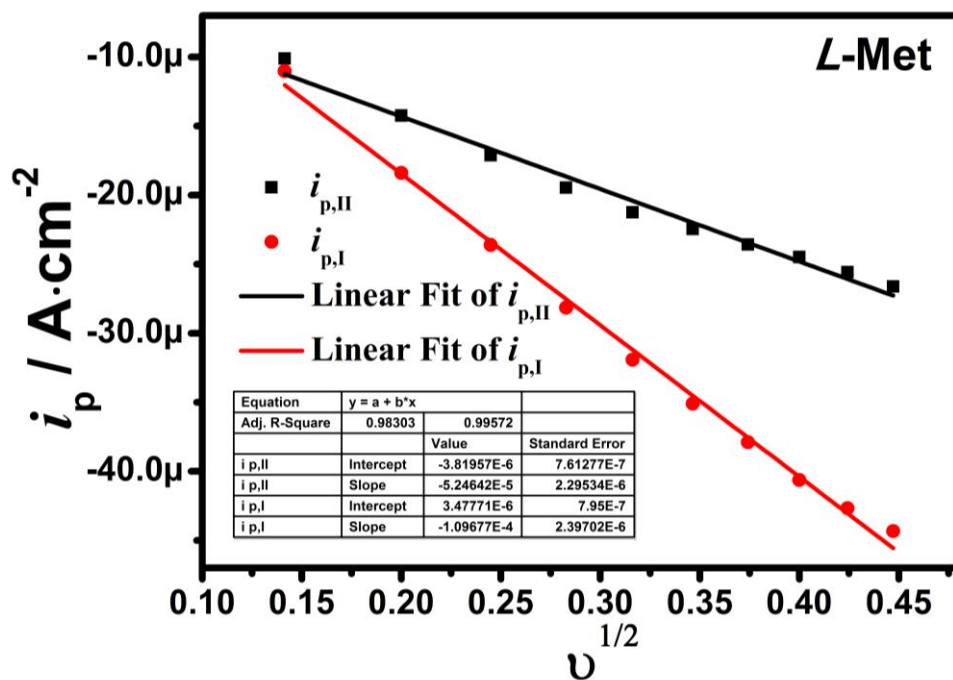

**Fig. S12.** Top: CVs of Zn-2/AuE in DMF-BMIMBF<sub>4</sub> solution with 0.9 mM L-Met at different scan rate from 0.02 V·s<sup>-1</sup> to 0.2 V·s<sup>-1</sup>. Below: Plots of  $i_{p,I}$  and  $i_{p,II}$  vs  $v^{1/2}$ , respectively.

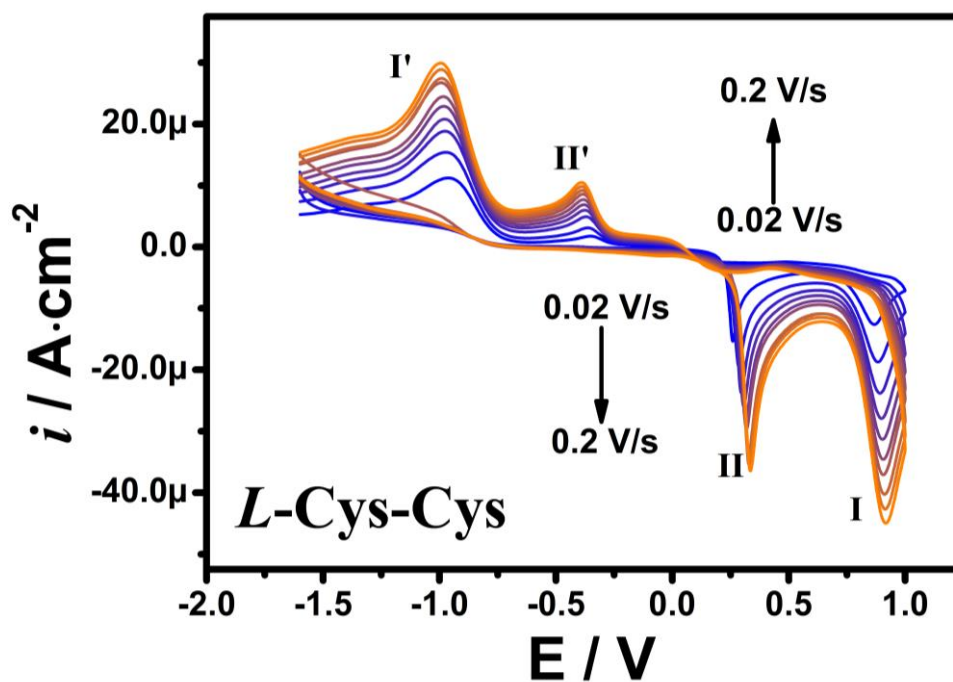

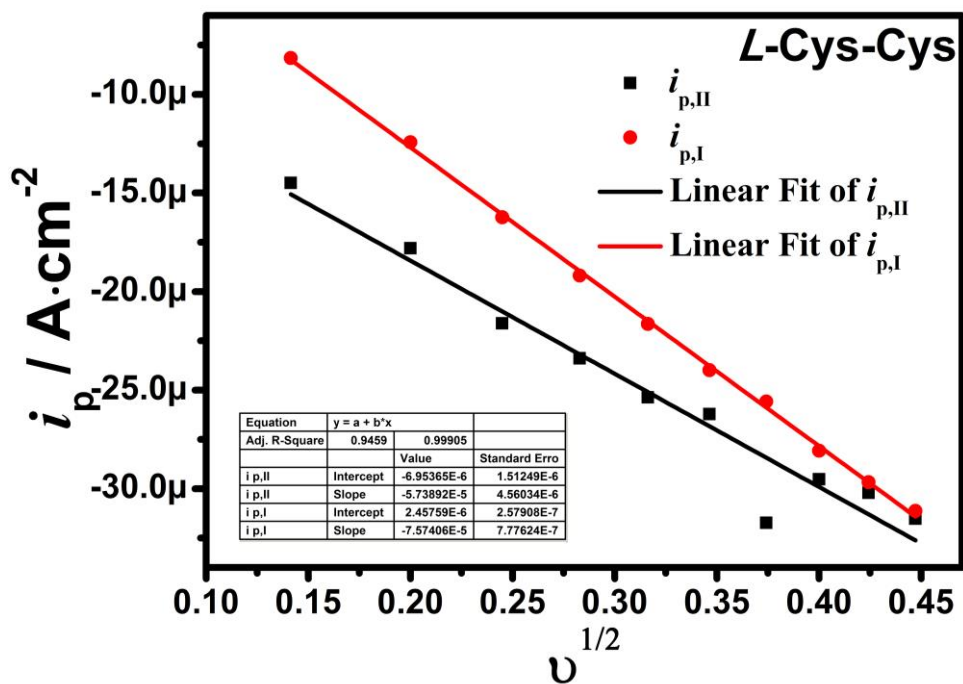

**Fig. S13.** Top: CVs of Zn-2/AuE in DMF-BMIMBF<sub>4</sub> solution with 0.9 mM L-Cys-Cys at different scan rate from 0.02 V·s<sup>-1</sup> to 0.2 V·s<sup>-1</sup>. Below: Plots of  $i_{p,I}$  and  $i_{p,II}$  vs  $v^{1/2}$ , respectively.
